# Supplementary material for: Defining the epitope of a blood–brain barrier crossing single domain antibody specific for the type 1 insulin-like growth factor receptor
Source: Sci Rep. 2021 Feb 19;11:4284. doi: 10.1038/s41598-021-83198-w (PMC7896052; doi:10.1038/s41598-021-83198-w)
Supplement: Supplementary file 2 — Supplementary Table S1. [file 41598_2021_83198_MOESM2_ESM.xlsx]

## Sheet: Sheet1
					Uptake - Control (%)				Uptake - IGF1 (%)				Uptake - IR5 (%)										Uptake error - Control (%)				Uptake error- IGF1 (%)				Uptake error- IR5 (%)
Start	End	Peptide m/z (Da)	Charge (z)	RT (min)	1 min	3 min	10 min	60 min	1 min	3 min	10 min	60 min	1 min	3 min	10 min	60 min		Start	End	Peptide m/z (Da)	Charge (z)	RT (min)	1 min	3 min	10 min	60 min	1 min	3 min	10 min	60 min	1 min	3 min	10 min	60 min
9	16	525.268	2	7.42074	41.1652	46.322	51.4466	51.7436	35.611	40.5367	45.8276	50.2362	38.7196	48.2044	51.0434	52.2356		9	16	525.268	2	7.42074	2.65518	2.31613	2.29621	1.98672	1.41041	1.43749	2.98612	1.85045	3.79116	1.49789	2.77036	1.37554
28	33	386.243	2	15.7203	0.400994	0.181694	0.504017	0.333244	0.85234	1.30496	0.784154	0.277849	1.00373	0.227624	0.831443	0.841196		28	33	386.243	2	15.7203	0.503052	0.0488208	0.409147	0.280221	0.513137	1.03425	0.569906	0.169699	0.93801	0.248871	1.0768	0.862893
40	48	615.34	2	11.9667	37.0485	38.6949	40.5473	43.4854	37.4261	38.9	39.7352	42.3642	37.0789	40.9184	39.9404	45.9611		40	48	615.34	2	11.9667	2.20529	2.01948	1.35696	1.70473	1.22802	1.10632	2.33028	0.577836	1.58815	1.61477	1.18563	0.829935
40	48	410.563	3	11.9598	36.1575	37.8683	38.8744	42.012	36.465	38.3732	38.5521	40.7481	35.6353	39.8637	39.733	44.0533		40	48	410.563	3	11.9598	1.51023	1.68147	1.91465	1.11025	1.83136	1.23399	2.58548	1.0313	1.59652	1.31963	2.17349	0.854191
43	48	412.247	2	12.1434	23.5494	25.6413	26.1205	31.3216	24.2131	24.5919	26.2276	31.062	24.2787	26.0658	26.7148	34.7197		43	48	412.247	2	12.1434	2.63262	1.37131	1.92464	0.742339	1.82521	0.898437	1.48774	0.972688	1.98329	1.34397	1.06285	0.58094
49	53	562.306	1	2.46425	1.96587	2.92717	3.08891	3.29636	2.80906	3.07401	2.6578	2.90002	2.02751	1.87986	2.71769	2.75518		49	53	562.306	1	2.46425	0.407641	1.05762	1.13039	1.25582	0.768747	0.879269	1.03211	1.1365	0.160103	1.45592	0.517576	1.24554
49	54	725.415	1	8.20754	0.625208	0.596029	0.555082	0.671965	0.63958	0.234511	0.514565	0.185749	0.889529	0.519676	0.647481	0.565774		49	54	725.415	1	8.20754	0.565776	0.74952	0.161642	0.411945	0.375588	0.244466	0.219899	0.197178	0.617178	0.333085	0.527115	0.617019
57	63	388.247	2	13.5938	15.9844	21.7951	31.8837	43.4825	14.4072	20.8413	30.3051	39.1844	15.2334	23.1152	33.1241	42.3633		57	63	388.247	2	13.5938	1.10027	1.09712	1.81076	1.26644	0.965138	0.952463	2.1091	0.972029	2.48036	0.879516	2.07702	2.69826
58	63	331.693	2	11.1232	19.5353	24.7161	38.0868	49.9449	18.9145	24.0383	35.932	46.8264	18.73	26.6665	39.7757	49.0077		58	63	331.693	2	11.1232	1.40853	1.63824	2.41084	1.17001	1.11791	1.11788	1.34545	1.64225	1.33809	0.974368	2.69298	1.23418
58	73	874.543	2	22.5153	7.98883	12.2851	17.85	24.8257	8.16421	11.7867	17.2949	24.0371	8.35298	14.0236	19.268	25.6567		58	73	874.543	2	22.5153	1.40792	0.975683	1.61821	1.89879	1.01368	0.66356	1.84448	0.821997	1.30813	1.07749	1.57201	0.863387
59	73	801.008	2	21.3122	8.57582	12.717	17.631	23.9429	8.56757	12.998	17.39	23.4849	8.73792	14.4372	19.9129	26.1708		59	73	801.008	2	21.3122	1.05732	0.505312	0.922362	1.13357	1.48685	0.995063	1.69208	1.48015	1.40222	1.07672	0.99958	2.15231
64	70	780.424	1	16.5405	1.22886	2.97292	5.57406	14.9651	1.70897	3.49641	6.17539	15.4638	1.90573	3.66798	7.66486	17.2041		64	70	780.424	1	16.5405	0.84304	0.749008	0.41207	0.597201	0.626583	0.653861	0.550025	0.353662	0.64164	0.744854	0.943186	1.04879
64	73	1104.55	1	19.7718	1.63776	1.95491	4.14589	11.6214	1.61628	2.07471	4.92347	12.5178	1.43809	2.88383	5.82022	13.524		64	73	1104.55	1	19.7718	0.554107	0.27969	0.68529	0.302886	0.47291	0.302232	0.874181	0.495952	0.27998	0.655023	1.08615	0.42167
67	73	775.401	1	16.4533	1.40137	1.35152	3.04627	8.33379	1.24734	1.95163	3.22183	8.64834	0.644512	1.79925	4.51751	10.005		67	73	775.401	1	16.4533	1.06696	0.205348	1.1527	0.845079	0.82035	0.512399	0.767457	0.636335	0.828004	0.249764	0.413648	0.756866
74	81	486.804	2	12.4438	3.02237	4.94938	10.0979	16.8065	3.7197	6.5152	11.9421	16.7583	3.98369	7.70945	13.4816	16.5886		74	81	486.804	2	12.4438	0.227568	0.694325	0.647728	0.612614	0.335042	0.275594	1.01055	0.408546	0.539648	0.3632	1.31695	0.403964
74	81	324.864	3	12.5288	2.54262	4.09763	8.73765	15.2592	2.80216	5.16188	10.6925	15.2149	3.1623	6.11674	12.5351	15.6317		74	81	324.864	3	12.5288	0.429353	0.350312	1.16431	0.498383	0.191687	0.265011	0.599165	0.121184	0.593123	0.678957	0.953109	0.603514
74	86	544.296	3	17.6054	20.0152	24.0344	28.7703	27.5919	15.193	19.4947	26.5542	29.0141	12.9026	16.2651	21.2527	28.1215		74	86	544.296	3	17.6054	2.71552	3.83741	2.01865	5.47058	0.45298	2.02883	1.8408	2.19205	1.41665	0.483605	0.887632	2.05095
75	81	436.277	2	12.4703	2.39347	4.94102	10.494	18.5823	2.50084	5.96514	12.3563	18.8538	2.87377	7.22838	15.2409	18.8713		75	81	436.277	2	12.4703	0.660303	1.20673	1.4132	0.640908	0.346579	0.798469	0.772001	0.781451	0.936667	0.916586	1.91206	0.533141
82	86	677.331	1	9.15995	9.83821	15.988	18.1502	18.8419	11.3075	15.6936	17.7506	17.379	13.8074	19.9436	18.003	18.9081		82	86	677.331	1	9.15995	1.49346	1.23216	1.49373	0.836611	1.2697	1.33865	2.27623	1.69891	3.03216	1.99468	0.767491	0.859261
82	87	790.42	1	13.7892	6.91125	11.431	13.4006	13.4409	7.74973	10.7901	12.4331	13.0154	9.13562	13.295	13.3493	13.5273		82	87	790.42	1	13.7892	1.3919	0.324274	1.14814	0.784688	1.19742	1.03915	0.935434	1.46122	2.44797	0.990221	0.86294	0.182083
82	87	395.694	2	13.7607	7.19835	12.3076	13.6809	13.7257	8.34317	11.3792	13.2182	13.9734	10.4302	13.6338	14.832	14.1069		82	87	395.694	2	13.7607	1.95027	0.752454	0.631982	0.9158	0.621935	1.10166	1.66077	1.41124	2.16519	0.219114	0.543855	0.908205
87	91	620.402	1	13.1553	0.7565	0.378719	0.419653	0.702024	0.566418	0.435289	0.649244	0.486439	0.346937	0.377859	0.54943	0.808799		87	91	620.402	1	13.1553	0.289647	0.26637	0.375521	0.625925	0.428875	0.393877	0.400165	0.642787	0.348517	0.258933	0.246126	0.303985
91	100	567.328	2	14.2291	5.47207	6.27795	5.76688	6.67388	5.45816	5.55518	5.95614	6.7958	5.49226	6.27795	6.37294	7.54426		91	100	567.328	2	14.2291	0.630487	0.889552	0.955794	0.227711	0.671725	0.587815	0.807232	0.626814	0.979315	0.39697	0.42363	0.134022
92	100	502.778	2	13.5115	6.27621	6.15682	6.20208	7.31597	5.92743	5.93095	6.40784	7.46947	5.96625	6.75551	6.77595	7.75937		92	100	502.778	2	13.5115	0.527907	0.481846	0.445322	0.578372	0.295157	0.385202	0.623991	0.661958	0.610385	0.642909	0.249507	0.385753
120	124	586.255	1	4.9249	18.5525	18.0977	19.6135	24.8061	16.4773	18.2173	18.2164	22.2816	15.714	17.7425	18.5698	23.6171		120	124	586.255	1	4.9249	2.29327	0.549829	1.55021	2.35972	3.2186	2.01151	2.32794	1.38459	1.25125	2.5013	4.3739	3.11272
125	131	845.557	1	20.1716	15.5759	18.775	22.603	29.1887	15.0372	19.1418	22.324	28.5227	14.6754	19.7441	23.5705	28.7519		125	131	845.557	1	20.1716	1.78806	0.829765	0.527678	1.03596	0.939054	0.737905	1.45972	0.748722	1.48861	0.503912	1.40971	0.589159
138	149	435.553	3	2.45811	12.3852	13.3264	14.804	15.9674	12.9474	13.9746	15.8039	16.3328	12.2614	14.0391	15.3997	17.0586		138	149	435.553	3	2.45811	0.207875	0.777782	0.911368	1.08498	0.298651	1.07854	0.648298	0.994086	0.492249	0.480439	0.907068	0.267391
323	331	504.781	2	14.3099	1.18193	2.11816	2.17359	8.23526	2.1391	2.84128	5.72356	13.1201	2.36067	3.13301	4.46139	10.5837		323	331	504.781	2	14.3099	0.236623	1.11559	0.97205	0.747005	0.723099	1.03229	0.447806	0.642423	0.617309	0.703388	0.937001	1.08249
325	331	402.75	2	11.541	2.59201	1.92438	2.96113	4.50056	2.47173	3.13669	2.46417	4.95596	2.63474	3.24078	3.73218	6.33127		325	331	402.75	2	11.541	2.05883	0.497104	0.399314	1.20333	1.24309	1.25155	1.19523	1.92534	1.87211	2.20145	0.507228	1.62179
331	339	357.206	3	2.90079	41.9944	43.4316	44.1848	43.6242	42.3422	43.6138	44.041	43.5394	41.4472	45.187	43.0823	44.9621		331	339	357.206	3	2.90079	2.32811	2.22437	2.18979	2.32926	1.69397	1.81589	2.96056	1.32393	2.22243	1.60607	2.95128	1.49345
331	343	735.413	2	7.95793	48.6931	50.962	52.8429	52.2447	49.4149	51.1241	52.5163	51.1724	47.9041	51.7708	51.5496	52.6126		331	343	735.413	2	7.95793	1.84623	3.18406	2.61498	1.86155	1.88774	1.61682	4.12848	1.73754	1.47509	1.54014	1.99234	1.67952
331	343	490.607	3	7.95141	48.8737	51.1502	51.724	52.1703	49.6525	51.3075	51.7077	51.3995	48.028	53.2366	51.7911	52.3749		331	343	490.607	3	7.95141	2.74559	2.35005	2.45797	1.83911	2.03264	1.79828	3.02801	2.05757	2.0171	1.38206	3.06245	1.96968
331	344	528.303	3	12.5514	41.6046	43.0085	44.5761	48.1478	41.2415	43.2448	45.1277	46.2998	40.2612	44.2953	44.8323	48.5518		331	344	528.303	3	12.5514	1.99968	1.82937	2.5788	2.58718	1.50305	2.12397	2.60495	1.73855	1.67446	1.30451	2.42552	1.30341
332	339	478.773	2	1.93331	49.1177	50.326	51.0359	50.3714	49.3365	50.5945	50.4738	49.9728	47.6716	51.0716	50.6875	51.7238		332	339	478.773	2	1.93331	2.5044	1.93481	2.56533	1.6124	2.27395	1.94459	3.8986	1.67519	1.95084	1.58295	3.227	1.46046
332	347	620.691	3	16.0761	40.1399	45.7543	48.7522	53.1379	38.3517	44.6776	49.818	48.2723	37.2622	43.9281	50.1049	52.0898		332	347	620.691	3	16.0761	2.02274	3.01531	2.47297	2.46627	1.76482	2.69592	5.42215	2.27979	1.80642	1.18434	2.72395	1.27303
332	350	721.033	3	22.4933	32.6657	39.0211	44.8804	52.1416	32.4679	38.6843	44.1251	50.4349	31.9857	38.3336	43.5567	49.8773		332	350	721.033	3	22.4933	1.28744	2.26014	2.42543	2.59068	2.06042	1.32472	2.39479	1.0137	1.77353	1.83269	2.77899	2.4813
333	340	478.77	2	1.93327	49.0953	50.3784	51.0201	50.3431	49.3305	50.5884	50.4846	49.9433	47.6481	51.654	50.6621	51.723		333	340	478.77	2	1.93327	2.53072	1.95816	2.63287	1.74407	2.30516	1.94456	3.87714	1.65521	1.95986	2.24263	3.26942	1.50968
351	356	617.381	1	3.233	2.38087	2.22052	2.5913	1.91512	2.26381	2.42417	2.30806	2.69797	2.19817	1.7871	2.33526	2.84132		351	356	617.381	1	3.233	0.657157	0.717412	0.217859	1.22551	0.145963	0.343905	0.449833	0.351553	0.0998192	0.500552	0.555692	0.334378
357	366	612.347	2	2.28572	1.25953	1.88891	3.98624	5.886	2.35631	3.5797	5.45054	5.73182	1.94462	2.3429	4.00671	6.31303		357	366	612.347	2	2.28572	0.161629	0.396746	0.350687	0.380171	0.380312	0.883133	0.256304	0.845467	0.214223	0.343085	0.705137	0.762826
357	368	705.399	2	2.45359	17.1337	18.501	19.6679	21.0016	16.3998	18.9554	20.6889	20.8294	16.257	18.5647	19.8759	21.7676		357	368	705.399	2	2.45359	0.686072	1.21042	0.536852	0.839379	0.830774	0.806335	2.06886	1.07028	1.14871	0.52239	1.17471	0.4897
357	368	470.599	3	2.45525	17.0861	18.2875	19.8763	20.725	16.8568	19.3179	20.9531	21.0246	16.9976	18.8114	20.3751	21.4342		357	368	470.599	3	2.45525	0.805944	1.01115	1.16865	1.20948	0.350627	0.650347	1.75856	0.989564	0.618285	0.781688	1.70549	0.691894
371	377	452.291	2	11.9452	1.26772	1.16246	1.24196	1.8512	1.24946	1.94599	2.49488	3.41179	0.87431	2.03614	1.95481	2.99339		371	377	452.291	2	11.9452	0.51516	0.590258	0.604702	1.45584	0.840484	0.373104	0.556403	1.61333	0.722873	0.354558	0.446154	0.821465
372	377	378.756	2	6.45493	2.30861	2.29415	2.47009	2.87555	2.35612	1.81794	2.98603	2.82776	2.52719	2.52482	3.06615	1.94566		372	377	378.756	2	6.45493	0.826834	0.695182	0.736533	0.973888	1.00919	1.15069	0.667424	0.954483	1.71393	0.805474	0.131635	0.732768
372	379	491.844	2	13.3974	1.4398	1.32589	0.64098	2.12654	0.942135	1.48667	0.657066	0.803646		4.52462	6.00174	3.18075		372	379	491.844	2	13.3974	0.855892	0.883415	0.651245	1.3647	0.798645	0.506643	0.536215	0.221134		0.696433	1.48151	0.540309
375	379	627.496	1	13.7038	1.40136	1.44372	0.845137	1.46972	1.53203	1.19971	0.987192	0.765665	1.14295	0.881964	2.00873	1.29267		375	379	627.496	1	13.7038	0.898426	0.273521	0.599556	1.04674	0.524207	0.366001	0.667928	0.471278	0.851291	0.788178	0.514268	0.552182
375	381	407.264	2	12.1128	1.57599	2.17386	2.22144	2.205	1.79022	2.74393	1.91146	2.86469	1.98912	1.89517	2.25184	2.04014		375	381	407.264	2	12.1128	0.640408	0.423521	1.00141	0.665227	1.15822	1.21025	0.3306	0.743866	0.41194	0.701214	0.397344	0.284618
375	384	592.389	2	15.2265	7.91502	13.3312	18.4059	25.5803	7.35604	11.0403	16.9612	26.2011	8.04931	12.4723	17.2238	25.5903		375	384	592.389	2	15.2265	1.0345	0.909208	1.9056	1.55644	1.34318	2.00482	1.71183	2.48467	0.589002	0.678748	1.49918	1.85831
378	384	801.508	1	10.8386	7.93151	13.1532	20.0168	30.3315	7.50296	12.7832	19.4337	29.3151	7.06596	13.2177	20.3306	30.4779		378	384	801.508	1	10.8386	0.988441	0.876006	1.28895	0.865276	0.862324	0.709528	1.23837	0.627528	0.556164	0.929952	1.41882	1.03775
391	398	978.574	1	11.27	1.14405	1.69565	4.30205	11.0953	1.39908	2.39272	5.23673	11.9011	0.788948	1.20952	3.55466	10.1715		391	398	978.574	1	11.27	0.561164	0.379751	1.26795	0.476778	0.272672	0.361311	0.860181	0.43719	0.315439	0.470364	0.522283	0.517135
391	398	489.745	2	11.2932	4.67332	4.81959	6.97297	13.0143	4.73263	5.85233	8.41212	13.8393	4.47358	5.34139	6.96504	12.8459		391	398	489.745	2	11.2932	0.623924	0.543791	0.703031	0.951248	0.351166	0.536397	0.933331	0.509278	0.357844	1.10963	0.907124	1.37624
391	401	674.383	2	13.5867	1.3446	2.47515	5.69844	15.1426	1.44929	2.58512	5.78731	14.765	1.29269	2.64848	6.10329	14.9009		391	401	674.383	2	13.5867	0.228311	0.675564	0.458502	0.510529	0.161889	0.160012	0.807289	0.342188	0.194048	0.139837	0.895393	0.510543
417	421	661.343	1	13.0123	6.19444	8.36753	16.6833	33.8008	5.78889	7.30051	11.0574	26.0559	6.10646	9.66903	16.8793	34.134		417	421	661.343	1	13.0123	0.912191	0.876852	1.77867	0.793745	1.40056	1.25689	0.714368	1.43328	1.93206	1.98461	1.17693	0.909253
417	424	999.624	1	15.0773		5.76795	10.4886	20.4918	2.43815	1.8058	6.39123	12.6457	4.02722	4.64367	8.82399	19.9473		417	424	999.624	1	15.0773		1.56114	2.3661	0.436472	0.760414	1.51911	0.648659	0.830377	1.51487	1.09605	0.987511	0.881736
417	424	500.264	2	15.0447	5.06545	6.96929	12.2002	20.4258	4.4839	5.25432	8.53365	16.2482	4.63694	6.00095	10.6524	20.515		417	424	500.264	2	15.0447	1.03338	1.05721	1.09341	0.744665	0.99957	0.556724	0.976979	0.661852	1.13537	0.4947	0.727176	1.00704
418	424	418.73	2	13.3871	4.7304	6.74452	13.0529	23.7284	3.89437	4.34434	9.05005	18.2028	4.16651	5.53599	10.8616	23.5706		418	424	418.73	2	13.3871	0.80176	0.575061	2.00924	2.18118	0.566123	0.875672	1.75887	1.35694	0.760722	0.276114	0.755677	1.26009
429	434	420.696	2	5.18528	4.20716	4.10235	7.6215	15.4929	4.07046	6.08334	6.79105	16.6484	3.67261	5.60243	6.52951	15.7596		429	434	420.696	2	5.18528	0.678134	1.11511	1.0789	0.917208	1.3369	0.799796	0.595857	1.66488	1.0318	0.565767	1.39527	1.48549
459	465	423.703	2	12.1641	30.9408	38.2286	42.022	43.7392	30.3136	33.5848	38.7469	42.7623	30.9031	37.5095	42.1483	47.4451		459	465	423.703	2	12.1641	4.41193	2.48593	2.49358	4.42092	0.881424	2.9747	2.56869	4.85324	0.171542	2.42633	5.0781	0.870668
464	478	606.999	3	11.7266	15.1851	18.505	21.573	26.8778	15.3146	18.2228	20.6389	26.7332	14.228	19.5962	22.0531	28.352		464	478	606.999	3	11.7266	1.49322	1.40267	1.11416	1.28648	1.403	1.78523	1.74979	1.70005	1.34884	0.656094	1.2582	0.889792
466	478	767.931	2	11.2291	17.4817	20.973	23.9462	30.3021	16.9488	20.6262	23.1407	29.2437	16.3494	21.78	24.4545	31.9214		466	478	767.931	2	11.2291	1.71766	1.25971	1.68432	1.55321	0.96376	1.62507	1.84487	1.05292	1.07623	0.748581	1.54854	1.09658
466	478	512.284	3	11.2413	18.3595	21.5013	25.0013	31.1362	18.4724	21.3971	24.3965	30.5143	17.5207	22.774	25.6037	33.0581		466	478	512.284	3	11.2413	1.63756	1.46	1.52588	1.26665	1.10822	1.51824	2.14372	1.14932	1.09142	0.803136	1.61839	1.07646
466	479	574.345	3	16.4533	16.1488	17.9373	23.0471		15.6914	18.568	20.7669	28.8378	15.2387	19.8377	23.04	30.4103		466	479	574.345	3	16.4533	1.44283	2.12932	1.44639		0.482523	1.65732	2.42586	1.53061	0.81331	1.43122	2.32842	1.60476
466	487	561.923	5	15.516	22.9964	25.4632	27.9395	32.2965	22.9632	25.5083	27.6215	32.0246	22.2175	25.9908	27.8898	33.6199		466	487	561.923	5	15.516	1.65796	1.43946	1.46505	0.788496	1.1253	0.981616	2.25495	1.05541	1.47263	1.00923	0.972427	0.90037
466	489	616.12	5	14.6503	25.9674	27.6725	30.0288	33.9606	24.9813	27.6675	29.6733	33.2859	24.1306	28.2557	30.2638	35.1298		466	489	616.12	5	14.6503	1.4415	0.977029	1.60046	1.12307	1.50561	1.16922	2.15737	1.13554	1.39732	1.08819	1.87201	1.30605
466	490	638.737	5	16.2106	27.5097	29.8997	32.2492	36.1813	26.9212	29.5325	31.8951	35.3198	26.1975	30.7321	32.2915	36.9577		466	490	638.737	5	16.2106	1.68693	1.66548	1.45317	1.24457	1.43399	1.06114	2.15429	1.07434	1.41626	0.887143	1.81175	1.12977
466	492	678.76	5	16.7517	29.2619	31.9399	35.3042	39.2175	28.412	31.6491	34.599	38.4111	28.2169	33.3589	35.3296	39.9771		466	492	678.76	5	16.7517	1.75836	1.574	1.61836	1.03891	1.36966	1.30524	1.96296	1.37562	1.49331	0.990779	1.71836	1.27955
466	493	708.173	5	18.5794	27.7578	31.1789	34.0972	37.9175	26.0002	29.7415	34.0204	36.9659	25.9671	31.795	34.2976	38.7986		466	493	708.173	5	18.5794	1.56009	1.31108	1.69145	0.803171	1.05767	1.38652	2.79095	1.91959	1.25368	0.693728	1.6638	1.45189
479	487	430.54	3	8.63452	40.6872	43.4618	43.7553	43.2142	41.779	42.8793	44.4398	43.8095	41.6012	44.6965	43.909	44.2236		479	487	430.54	3	8.63452	3.47972	1.90135	1.8829	1.38274	1.37954	1.97843	2.14535	1.48708	2.19638	1.03143	3.37652	1.66263
488	493	375.71	2	13.547	38.6266	43.6108	49.067	51.2216	32.8067	39.1787	45.9658	50.75	35.1244	46.0267	49.1132	52.3116		488	493	375.71	2	13.547	2.21303	2.5668	3.84864	3.5803	1.63919	2.70235	3.20532	3.07231	4.20647	1.65241	3.0816	1.48847
524	537	753.442	2	12.102	37.5802	43.0891	47.5613	49.1065	35.7446	41.3798	46.0683	48.2138	35.4938	44.1642	47.0952	49.597		524	537	753.442	2	12.102	2.84441	2.01484	2.86413	2.88134	2.82927	2.96105	3.14591	2.44571	3.49174	1.15447	2.60395	1.11853
524	537	502.609	3	12.0919	39.2852	45.1605	50.2458	51.4634	37.6426	43.1669	48.7034	50.7283	37.2703	46.4811	49.6912	52.2474		524	537	502.609	3	12.0919	3.23542	2.15031	2.74293	2.49638	2.77602	2.21835	4.23278	2.83771	3.16922	1.54051	3.00144	1.64529
524	547	683.148	4	17.8331	24.2445	29.1271	34.0978	38.6816	22.9664	27.426	33.0225	38.1079	22.7071	29.3132	33.7248	39.4754		524	547	683.148	4	17.8331	1.88982	1.4658	1.97135	1.49708	1.69447	0.918483	2.16175	1.70658	1.84072	1.14609	2.05286	1.0531
524	549	725.675	4	18.5537	21.2258	25.1632	29.0523	34.0748	19.5676	24.5257	29.0333	34.3011	19.5597	25.7392	29.6252	34.5577		524	549	725.675	4	18.5537	1.21345	2.26269	1.73928	1.48904	1.32921	1.1049	3.05505	1.74101	1.48492	1.12945	1.83753	1.40283
538	546	540.303	2	9.05964	13.5299	17.5983	23.3166	32.9459	14.3114	16.9583	20.9387	32.8596	13.2977	17.4244	22.0735	34.2595		538	546	540.303	2	9.05964	1.6526	0.972441	1.72154	1.33798	1.04703	1.48832	1.73152	1.96215	0.410795	0.363511	1.0537	2.13849
538	547	621.864	2	12.2127	11.5044	14.1519	18.3687	26.9642	11.7472	14.0916	17.5368	26.8239	11.1078	14.7112	18.237	27.7897		538	547	621.864	2	12.2127	1.10521	0.965062	1.2299	0.619816	0.813788	0.676607	0.979552	0.917568	0.762181	0.394158	1.04902	0.275933
538	547	414.889	3	12.2236	12.5391	15.1335	19.2244	27.534	12.8297	15.0746	18.7981	27.9709	12.3477	15.2673	19.1612	28.1195		538	547	414.889	3	12.2236	1.24787	0.845754	1.77365	0.447313	1.01586	0.495538	1.79428	1.0181	0.66597	0.631407	1.23243	1.51077
538	549	706.924	2	13.9465	10.149	12.0713	15.2063	22.5239	10.0992	11.8732	14.7544	22.1764	9.48937	12.3282	15.3575	22.8366		538	549	706.924	2	13.9465	0.91147	0.431147	1.09709	0.795819	0.865899	0.672674	1.02827	0.294506	0.732643	0.624533	1.03748	0.467486
538	549	471.592	3	13.9394	9.58953	11.8065	15.3414	21.9824	10.0912	11.8117	14.7601	21.8196	9.45549	11.8619	15.0978	22.3841		538	549	471.592	3	13.9394	1.1336	0.348088	0.676818	0.307159	0.607925	0.550728	1.02681	0.831499	0.444525	0.763806	0.859773	0.922299
538	550	525.948	3	14.9811	8.74734	11.7903	14.4371	19.9987	9.66933	12.0115	13.911	20.3228	9.08935	11.7515	14.1412	22.0852		538	550	525.948	3	14.9811	0.910116	0.825203	1.43307	0.82801	0.611116	1.17306	0.18558	0.790183	0.718336	1.22177	0.622305	1.50005
539	547	565.295	2	10.8801	14.6616	18.2062		27.8773	15.1279	17.6541	20.4308	30.6528	15.0145	16.7228		29.6697		539	547	565.295	2	10.8801	1.31178	1.64277		1.33795	2.08346	0.701304	2.11809	1.42137	1.86608	1.14689		1.19674
550	556	397.245	2	7.46236	36.195	42.3284	47.941	49.6696	34.294	39.1942	45.5005	48.4082	34.2223	43.6034	45.843	50.5785		550	556	397.245	2	7.46236	2.70894	2.67825	2.52324	1.06881	0.853666	1.94828	2.92226	1.85956	1.56387	0.945813	3.42122	0.890086
557	572	605.004	3	9.26728	29.9427	34.5159	38.9457	41.6344	29.8019	34.0062	37.7406	39.5468	28.8614	35.5005	38.4825	42.2759		557	572	605.004	3	9.26728	2.02562	2.05094	2.18575	1.66202	1.23852	2.11394	2.41103	1.3947	1.73824	0.664323	2.38714	1.07632
557	572	453.981	4	9.269	29.9304	34.9425	39.6532	42.2685	30.1169	34.0307	38.2847	40.2554	29.242	35.9419	39.0937	42.6188		557	572	453.981	4	9.269	2.30666	1.98567	2.15863	1.69092	1.74855	1.76086	2.4493	1.42504	1.80249	1.27086	2.1051	1.20734
557	573	659.331	3	10.4939	26.7521	31.6664	36.1624	39.5101	26.7732	30.7298	34.6466	37.6767	25.978	32.7248	35.7282	40.5915		557	573	659.331	3	10.4939	2.78039	1.89076	2.21123	2.32019	1.65809	1.62875	2.60142	1.85135	1.87876	0.951628	2.33802	1.08685
559	572	527.61	3	6.50745	24.0514	29.4782	34.7655	37.8277	23.8386	28.6193	33.4353	35.7995	23.5448	30.1995	34.5741	38.6011		559	572	527.61	3	6.50745	1.49306	1.59827	1.94569	1.67593	1.26237	1.11794	2.30251	1.28064	1.60629	1.02849	2.26281	1.09947
559	573	581.969	3	8.65791	21.8914	26.5117	31.5521	36.2419	21.0429	25.5401	30.5842	34.2427	20.8965	27.1942	31.6737	36.993		559	573	581.969	3	8.65791	1.32098	1.26871	1.77193	1.16073	1.15715	1.36933	2.28118	1.13067	1.37751	0.908438	2.00536	1.20061
559	573	436.727	4	8.65951	21.9409	26.6636	31.8752	36.3081	21.291	25.6203	30.1652	34.3997	20.8631	27.3111	31.1748	36.6362		559	573	436.727	4	8.65951	1.40719	1.10194	1.66947	0.998549	0.917659	0.994066	2.25171	1.22056	1.19911	0.848688	2.05797	1.12316
598	611	774.968	2	14.6952	26.4944	34.1106	39.9108	41.9009	32.7598	39.9997	43.3029	45.8465	27.124	36.6366	40.3886	42.2431		598	611	774.968	2	14.6952	2.82271	2.76201	1.28746	2.25353	2.54907	2.49285	3.08676	2.1654	1.75152	0.950414	2.3188	1.38965
614	618	368.711	2	13.3735	1.46996	2.64253	2.64652	3.2764	2.12625	1.61606	2.63153	2.89596	1.17765	2.84963	2.47685	2.24946		614	618	368.711	2	13.3735	0.626795	1.00033	2.12191	1.74922	1.07739	1.88998	1.67326	0.630078	0.912702	1.13872	1.80726	1.40777
614	627	911.474	2	14.0495	26.2024	27.511	27.7736	28.2228	26.7399	27.5986	27.9021	27.5864	25.9076	28.3764	28.1396	28.5204		614	627	911.474	2	14.0495	1.91661	1.22816	1.88607	1.55172	2.05853	1.70534	2.18488	1.03983	2.02379	1.04712	1.74671	0.765425
614	627	608.009	3	14.0432	25.5309	26.8091	26.9925	26.7798	25.8217	26.7571	26.9793	27.014	24.9165	28.1376	27.2249	27.9687		614	627	608.009	3	14.0432	2.08687	1.46479	2.11332	1.67927	1.76064	1.73213	2.0086	1.75026	1.79	0.834713	1.4831	0.950221
615	627	829.94	2	12.1889	29.9567	31.6609	32.1402	31.5345	30.3188	31.4576	32.1469	31.8887	29.2294	32.51	31.8406	32.9052		615	627	829.94	2	12.1889	2.48871	1.43047	2.22242	2.10035	1.83205	2.209	2.83221	1.87367	2.23874	0.713999	2.27399	1.48833
615	627	553.654	3	12.189	30.613	32.3833	32.8596	32.6111	31.5358	32.5433	32.9768	32.7763	30.3324	33.3334	32.4552	33.6219		615	627	553.654	3	12.189	2.64254	1.94418	2.47465	1.9526	2.28295	1.47363	2.81506	1.76262	2.2052	1.45591	1.96523	0.975575
688	693	421.23	2	3.62497	36.6116	46.5762	59.0542	61.787	48.9969	54.9406	60.9015	59.8702	13.9485	21.6843	38.8476	58.89		688	693	421.23	2	3.62497	3.46745	3.31402	2.62092	5.82959	1.59192	2.53437	3.75764	1.52023	2.20804	1.80335	3.86316	0.866489
688	695	551.814	2	11.7173	35.7742	41.4516	47.9998	49.5177	32.1955	37.9948	45.4844	48.3544	14.5949	16.4385	28.6843	45.6228		688	695	551.814	2	11.7173	2.15375	2.69688	3.17548	3.67712	2.27024	1.94948	3.24808	3.44912	9.50329	0.375676	2.90187	1.66448
688	696	608.36	2	14.8227	32.5382	39.3908	44.6576	44.6242	29.2917	32.3622	39.0643	43.265	9.91763	11.5615	22.7785	39.9657		688	696	608.36	2	14.8227	1.66131	2.61285	2.69373	3.42515	3.35529	1.07616	4.43801	2.1008	7.94425	0.564385	2.06029	1.89761
688	696	405.888	3	14.8442	32.4059	39.9548	45.9803	47.8473	27.3011	33.3507	41.4098	44.8553	11.4978	12.17	24.146	42.5278		688	696	405.888	3	14.8442	3.15546	1.94467	3.88369	3.53307	2.41913	2.77652	3.46517	2.57979	8.20531	0.788838	2.05589	1.4116
688	701	605.315	3	17.6224	34.7259	40.3796	43.5631	44.6681	20.365	27.8206	35.8111	41.8605	14.3686	17.6846	25.0655	39.169		688	701	605.315	3	17.6224	2.59072	1.8124	2.29249	2.68503	2.09111	1.997	3.5252	1.92277	2.15768	0.442345	1.08983	1.51168
688	701	454.24	4	17.6191	33.4537	39.3652	42.4035	42.4074	19.4687	26.4291	34.66	39.8742	13.1729	16.6132	23.6532	37.7315		688	701	454.24	4	17.6191	1.91825	1.99311	2.47965	1.92453	2.52512	2.44518	2.75895	1.82447	1.95364	0.357512	1.63295	1.53238
694	701	496.252	2	15.8104	32.9704	35.7898	37.0292	36.7991	12.0046	17.7689	27.4743	33.1892	15.7078	21.9309	23.8411	31.4969		694	701	496.252	2	15.8104	2.01705	2.00601	2.68542	2.5525	1.1833	1.78375	2.41264	2.89119	3.96484	0.710512	1.69803	0.933622
695	701	439.233	2	13.6397	31.7233	31.9813	32.9048	32.3297	12.3607	16.4556	24.9444	29.1814	17.4357	23.6459	23.9603	28.6454		695	701	439.233	2	13.6397	2.60512	1.46471	2.77622	1.44968	1.12696	1.98264	1.77752	0.64018	4.49907	0.654519	2.42295	1.20327
696	701	730.388	1	9.69102	40.5256	42.0423	42.3817	42.0599	15.5137	22.0517	31.9216	39.2768	23.7299	31.6109	34.5265	39.6691		696	701	730.388	1	9.69102	1.68732	2.12747	1.76039	2.44678	1.57232	1.44409	2.5294	1.11431	6.964	1.49927	2.14549	0.648895
741	748	1045.57	1	18.6028	38.6513	40.6612	43.0476	48.2819	38.0105	40.7984	44.1373	49.347	35.9023	42.8069	42.5084	48.076		741	748	1045.57	1	18.6028	1.66498	1.76154	2.49841	1.86083	2.49113	1.60565	3.04123	2.24114	1.57075	1.33857	2.43467	1.4485
741	748	523.25	2	18.6883	38.6882	41.0538	43.6457	47.6644	37.6993	41.3597	43.9425	48.3046	36.2753	41.6408	43.0291	48.1862		741	748	523.25	2	18.6883	2.65379	1.43554	3.16872	2.03337	2.22509	1.88981	2.82009	1.85897	1.87774	2.32295	3.73622	2.33835
741	768	680.953	5	19.6116	23.9748	29.0933	32.8924	38.7798	24.4175	29.8548	33.886	39.7749	23.5402	29.8398	33.4585	40.1771		741	768	680.953	5	19.6116	2.05532	1.68262	1.58448	1.99444	2.0035	1.45583	2.3689	1.59189	1.42285	0.442615	1.73774	1.87685
742	748	932.485	1	17.4243	32.5971	34.0263	36.8613	42.7185	31.1708	34.5413	37.8342	42.8241	29.4139	35.1951	36.0759	42.1814		742	748	932.485	1	17.4243	2.39932	1.58165	2.05297	1.95642	2.82119	2.33038	3.1368	1.90053	2.2037	1.20349	1.88784	1.47679
742	748	466.711	2	17.3996	35.106	35.6217	37.5722	42.7154	32.6624	36.4132	38.5396	44.1247	32.038	36.2039	36.0075	44.8984		742	748	466.711	2	17.3996	2.65142	2.13489	2.34287	2.06921	3.45766	2.1115	3.20866	1.73365	2.84634	1.09561	1.68554	1.91289
749	763	880.466	2	9.87869	28.4842	33.6905	36.794	41.629	30.2252	34.6445	37.7971	42.0178	29.3633	35.7597	37.1809	42.6232		749	763	880.466	2	9.87869	2.21601	1.46019	2.1895	1.46429	1.79396	1.40876	2.0551	1.44214	2.02469	1.67794	2.49948	1.21446
749	763	587.336	3	9.90808	27.0905	32.6232	35.9772	40.8007	30.1902	33.9982	37.3631	41.7943	28.1858	34.6786	37.1816	42.4303		749	763	587.336	3	9.90808	2.65595	2.32256	1.70449	1.5643	1.80849	2.29132	2.29644	1.08421	0.677553	1.29789	2.41914	1.53321
749	763	440.732	4	9.91077	28.0326	33.3394	36.1652	41.0321	30.2141	34.4939	37.6612	41.6126	28.9931	35.3185	37.3521	42.5898		749	763	440.732	4	9.91077	1.81835	1.5539	1.81354	2.01905	1.70029	1.49408	2.07788	0.996311	1.66487	1.47011	1.99181	1.1091
749	768	792.096	3	15.0736	22.5709	27.6883	31.9133	37.9419	23.1977	28.282	32.9105	38.5618	22.2361	28.8203	32.767	39.1191		749	768	792.096	3	15.0736	1.58237	1.2832	2.35656	1.31856	1.6333	1.40104	2.49789	1.60969	1.36532	1.2434	2.1031	0.995057
749	768	594.351	4	15.0786	21.4601	26.3235	30.8135	36.7175	22.368	27.3119	31.4421	37.5148	21.2495	27.9986	30.9023	37.6342		749	768	594.351	4	15.0786	1.29442	1.40652	1.89478	1.7976	1.21604	1.63499	1.94849	1.57135	0.946658	1.02223	1.6456	1.34036
749	768	475.659	5	15.0864	21.5576	26.4359	30.5091	36.4895	22.7199	27.3992	31.4512	37.5109	21.751	27.8199	31.0707	37.8345		749	768	475.659	5	15.0864	1.41002	1.09733	1.21741	1.47863	1.36533	1.36077	2.23723	1.20238	1.26313	0.987448	2.04803	0.987398
757	763	401.742	2	8.81208	33.9455	36.2327	40.9828	39.0811	34.7124	38.4405	40.1975	38.6414	33.9115	41.5104	39.5781	39.6547		757	763	401.742	2	8.81208	3.12382	2.39146	2.07908	1.4219	0.502077	2.53191	2.99074	2.9341	1.50945	3.4667	1.72978	2.87313
757	768	708.916	2	15.4057	18.7672	21.8555	28.1873	32.5428	15.7831	22.0875	25.7527	33.1892		23.9189	26.9326	34.3678		757	768	708.916	2	15.4057	3.34539	1.97456	3.40342	1.92541	1.12244	1.85125	1.4028	2.31936		1.22404	1.39753	1.89807
757	768	472.948	3	15.5479	16.2126	21.1975	26.2984	30.2629	17.7318	21.7742	25.7335	30.7084	15.9474	22.5049	26.2966	31.6964		757	768	472.948	3	15.5479	2.68644	1.58013	1.98692	2.19773	1.52361	1.51863	2.56362	1.49204	0.768816	1.35834	2.10125	1.38212
757	769	527.304	3	16.4369	15.5443	21.0917	22.9294	29.5943	15.8672	21.5463	26.2129	30.0884	16.1519	21.8907	25.6372	29.3756		757	769	527.304	3	16.4369	1.68674	2.395	1.81709	1.41936	0.687662	2.01895	3.54503	1.10469	1.25184	1.16885	2.08513	1.45585
759	768	580.376	2	15.4546	12.6111	17.9789	22.9914	29.3655	12.8685	18.9657	23.7579	30.1847	11.2086	18.9225	23.7368	30.5573		759	768	580.376	2	15.4546	1.55585	1.19539	2.06324	2.55406	2.52296	1.29086	2.54904	1.07683	1.82249	1.96556	1.81056	0.470841
762	768	430.754	2	14.1036	10.3763	15.5453	24.7249	34.0015	10.2942	15.5308	25.8302	33.3932	10.1568	17.3518	25.2484	33.2343		762	768	430.754	2	14.1036	2.16441	1.6016	2.83983	1.75039	1.05609	1.17733	1.18179	1.35777	0.356288	1.40097	0.816431	2.53271
763	768	373.735	2	13.5068	11.305	17.5297	27.6061	30.4102	12.4183	18.305	24.9698	27.0782	10.5904	20.0802	26.9718	28.2935		763	768	373.735	2	13.5068	2.02044	1.23282	4.24908	3.28497	3.18842	2.97992	4.1696	2.907	2.62079	4.34258	3.86267	2.11507
764	768	317.188	2	10.3344	15.5046	26.1811	36.7517	38.4632	13.8488	25.2325	34.6779	35.4737	15.2962	26.9022	38.9501	37.9958		764	768	317.188	2	10.3344	3.36189	3.22134	4.44035	2.92866	2.60891	0.624737	3.27402	2.6114	2.94662	2.07495	1.49287	1.18606
769	785	497.725	4	11.4003	13.7065	15.5755	19.0418	24.258	15.5398	18.2729	23.0022	27.3978	13.7757	15.9744	19.4255	25.5224		769	785	497.725	4	11.4003	0.8221	0.914137	1.1237	2.15546	1.06673	0.454876	1.46968	1.25381	0.786927	0.674164	1.12213	1.43704
769	785	398.384	5	11.4048	13.8158	15.7359	18.651	24.4437	15.528	18.938	24.0253	28.0929	13.8033	16.1532	19.6833	25.5225		769	785	398.384	5	11.4048	0.834935	1.25423	0.723752	2.70052	0.515725	0.425349	2.13629	0.413957	1.35741	0.761636	1.82124	1.96538
769	786	519.483	4	10.9216	14.0505	15.9185	18.8519	24.8326	15.9099	19.1554	24.6551	29.858	13.5772	16.5524	19.8981	27.2817		769	786	519.483	4	10.9216	0.465294	1.15248	1.23723	2.69736	1.45846	0.353924	1.6195	1.49205	0.294806	0.837964	1.28003	2.17574
769	789	587.543	4	10.7832	16.3297	18.6078	22.2702	27.9481	18.1093	21.7899	27.0462	32.2272	16.3863	19.3411	23.0787	30.0278		769	789	587.543	4	10.7832	1.75195	1.13456	1.65681	1.83923	1.07321	0.619591	1.99345	1.48573	0.43769	0.696573	1.47526	1.62873
793	802	509.729	2	2.13215	20.5206	22.7931	25.3312	26.486	21.8781	22.8537	25.7489	27.0212	21.6076	23.659	25.1478	29.247		793	802	509.729	2	2.13215	1.75666	1.23384	1.86341	2.89168	2.03412	0.914319	2.79816	1.34211	1.90167	0.308975	1.30192	1.00899
793	817	898.49	3	13.2237	14.5593	18.4351	24.5813	33.2364	15.0723	18.6452	25.4512	34.0293	14.5506	19.0634	24.7235	34.5203		793	817	898.49	3	13.2237	1.63444	0.750836	1.94633	2.2223	1.47288	1.30477	1.96293	1.80923	1.35087	0.99525	2.17609	1.64641
793	819	985.213	3	17.1223	10.522	13.8992	20.7484	29.4644	11.1139	14.3597	21.7332	31.1342	10.6512	14.4143	21.1929	31.3329		793	819	985.213	3	17.1223	1.26053	0.82883	1.94093	2.01405	1.27455	0.660611	2.03587	1.0698	1.037	1.3772	1.5423	1.35567
793	819	739.135	4	17.1166	10.2942	13.7707	20.6005	29.0026	10.5676	14.1452	20.8743	30.4221	9.85907	13.2831	20.8052	30.6239		793	819	739.135	4	17.1166	1.42102	0.95586	1.53453	1.77496	2.19709	0.913124	2.12017	0.711873	1.69553	0.573874	2.0039	1.68313
803	819	977.561	2	17.4001	11.9206	17.172	26.739	38.6517	12.4687	17.1194	28.065	39.9474	11.8572	18.4404	27.4702	39.9464		803	819	977.561	2	17.4001	1.54254	1.50841	1.65005	3.33246	1.3091	1.50203	3.15404	1.45995	1.15981	1.06761	1.89771	2.09408
820	830	640.843	2	11.393	16.7727	20.0594	21.9932	28.6837	17.4094	20.6541	22.4742	28.8118	17.6453	20.9768	21.9773	29.3258		820	830	640.843	2	11.393	2.5548	1.06154	1.58438	2.65865	1.65177	1.27787	1.82444	0.651612	1.88807	1.30383	1.13208	1.80258
820	831	697.39	2	13.8612	13.8359	16.7842	18.2363	24.4378	14.3291	16.6846	18.976	26.8217	13.632	16.9129	17.5581	26.1647		820	831	697.39	2	13.8612	1.89635	0.505467	1.74296	1.52797	1.90644	0.386077	1.89823	1.05539	1.75616	1.20218	1.36799	0.835446
820	833	810.505	2	17.4005	11.9236	14.125	17.523	26.4453	12.0474	14.6138	17.9459	28.7299	11.5372	14.3831	17.6323	28.4004		820	833	810.505	2	17.4005	0.899125	0.626113	1.17616	1.67778	1.03928	0.366282	1.73576	1.24433	0.925631	0.675794	1.04214	1.07791
871	877	411.726	2	3.42111	5.94847	5.78945	4.70156		4.84177	5.74433	5.25708	5.50525	5.26037	5.91248	5.65704	5.79265		871	877	411.726	2	3.42111	0.975568	1.2645	1.89511		1.91457	2.0734	0.710001	1.22431	1.53362	0.864502	0.598563	1.32646
