# Supplementary material for: Defining the epitope of a blood–brain barrier crossing single domain antibody specific for the type 1 insulin-like growth factor receptor
Source: Sci Rep. 2021 Feb 19;11:4284. doi: 10.1038/s41598-021-83198-w (PMC7896052; doi:10.1038/s41598-021-83198-w)
Supplement: Supplementary file 3 — Supplementary Table S2. [file 41598_2021_83198_MOESM3_ESM.xlsx]

## Sheet: Sheet1
Starting Residue	Peptide sequence	Signal
674	KTEAEKQAEKEEAEY	48
675	TEAEKQAEKEEAEYR	49
676	EAEKQAEKEEAEYRK	46
677	AEKQAEKEEAEYRKV	50
678	EKQAEKEEAEYRKVF	64
679	KQAEKEEAEYRKVFE	54
680	QAEKEEAEYRKVFEN	54
681	AEKEEAEYRKVFENF	61
682	EKEEAEYRKVFENFL	55
683	KEEAEYRKVFENFLH	61
684	EEAEYRKVFENFLHN	41
685	EAEYRKVFENFLHNS	53
686	AEYRKVFENFLHNSI	99
687	EYRKVFENFLHNSIF	74.5
688	YRKVFENFLHNSIFV	125
689	RKVFENFLHNSIFVP	125
690	KVFENFLHNSIFVPR	555
691	VFENFLHNSIFVPRP	434.5
692	FENFLHNSIFVPRPE	1554
693	ENFLHNSIFVPRPER	154
694	NFLHNSIFVPRPERK	64
695	FLHNSIFVPRPERKR	62
696	LHNSIFVPRPERKRR	53
697	HNSIFVPRPERKRRD	65
698	NSIFVPRPERKRRDV	60
699	SIFVPRPERKRRDVM	60.5
700	IFVPRPERKRRDVMQ	77
701	FVPRPERKRRDVMQV	81
702	VPRPERKRRDVMQVA	73
703	PRPERKRRDVMQVAN	63
704	RPERKRRDVMQVANT	64
705	PERKRRDVMQVANTT	63.5
706	ERKRRDVMQVANTTM	61
707	RKRRDVMQVANTTMS	42.5
708	KRRDVMQVANTTMSS	53
709	RRDVMQVANTTMSSR	63
710	RDVMQVANTTMSSRS	51
711	DVMQVANTTMSSRSR	65
712	VMQVANTTMSSRSRN	67
713	MQVANTTMSSRSRNT	66.5
714	QVANTTMSSRSRNTT	62
715	VANTTMSSRSRNTTA	55
716	ANTTMSSRSRNTTAA	54
717	NTTMSSRSRNTTAAD	43.5
718	TTMSSRSRNTTAADT	44
719	TMSSRSRNTTAADTY	48
720	MSSRSRNTTAADTYN	68
721	SSRSRNTTAADTYNI	60
722	SRSRNTTAADTYNIT	72
723	RSRNTTAADTYNITD	78
724	SRNTTAADTYNITDP	86
725	RNTTAADTYNITDPE	74
726	NTTAADTYNITDPEE	56
727	TTAADTYNITDPEEL	60
728	TAADTYNITDPEELE	67
